# Supplementary material
Source: PubMed Central journal article supplement (PMC3719673)
Supplement: MCB.00136-13_zmb999100051so1.pdf [file MCB.00136-13_zmb999100051so1.pdf]

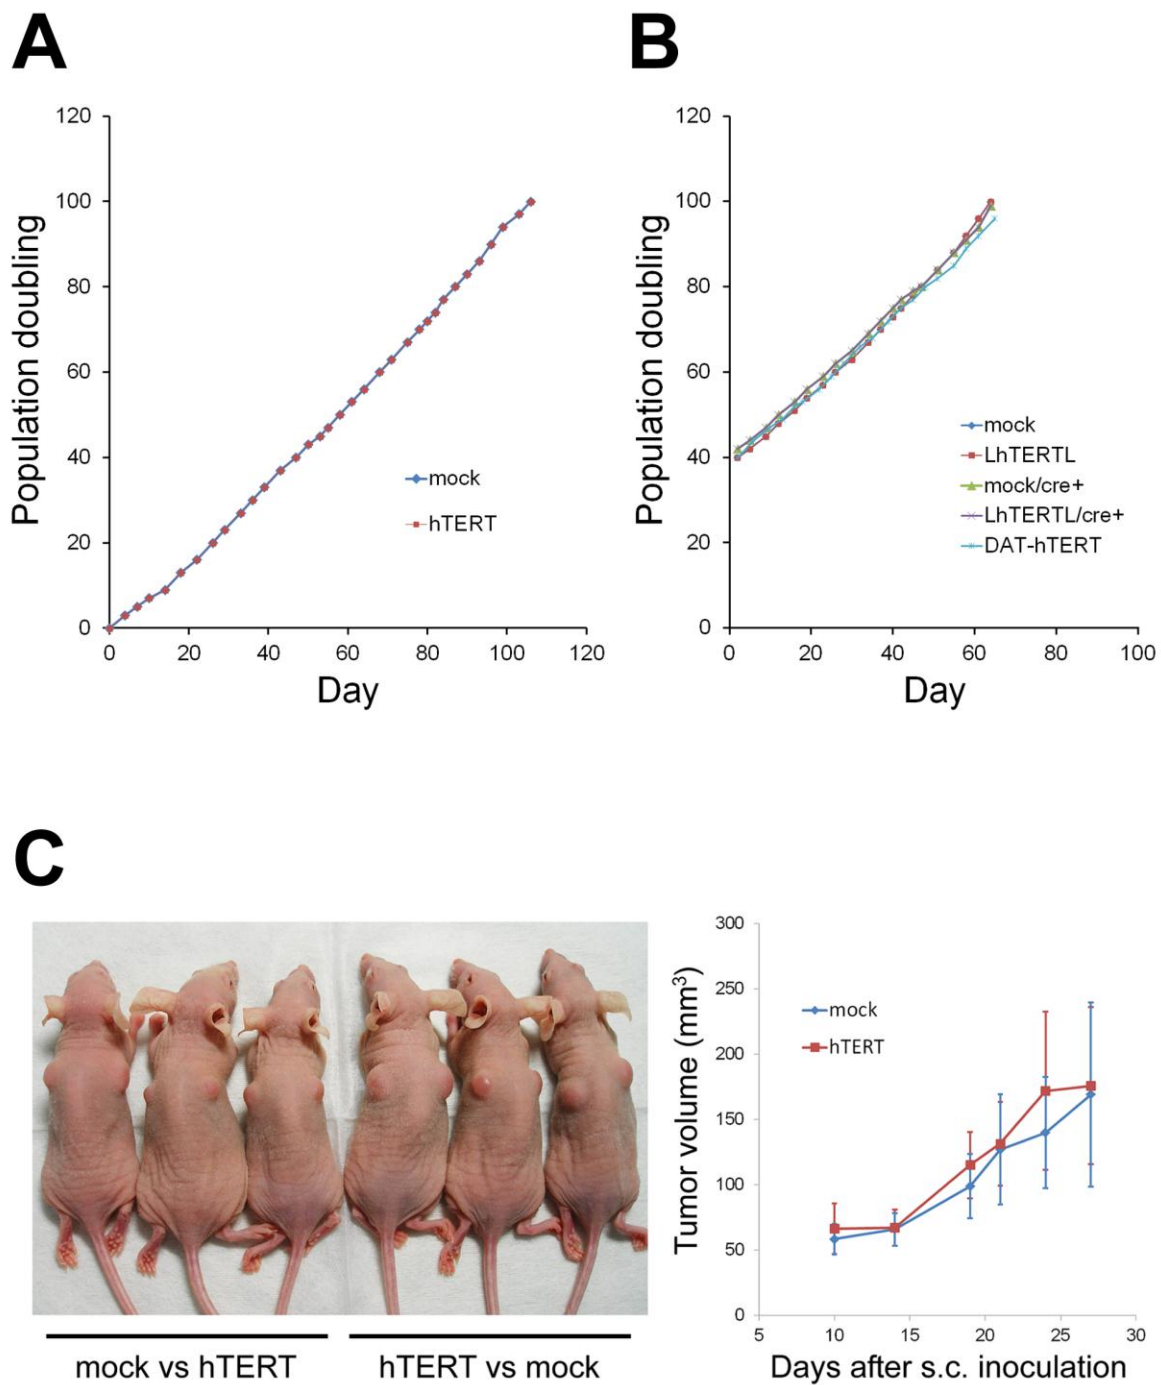

**FIG S1** Growth curves for the established PC-3 cell lines *in vitro* and *in vivo*. **(A)** Cells were retrovirally infected as detailed in the Materials and Methods. Population doubling (PD) 0 was defined as the time when the cells reached confluence for the first

time after G418 selection. **(B)** Cells were established as in Supplementary Figure 2. Confirming hTERT expression and telomere length after cre recombinase treatment at around PD 40 (Supplementary Figure 2), the day was reset as 0 for this growth curve representation. Under normal growth conditions *in vitro*, no considerable differences were found in the cell lines, irrespective of virus infection, telomerase activity or telomere elongation. **(C)** Nude mice were injected subcutaneously in the right or left flank with PC-3/mock or PC-3/hTERT cell lines, respectively. Representative animals are shown at 27 days after subcutaneous injection. There was no considerable difference in tumor volume between control and PC-3/hTERT tumors at any time point (blue circles, PC-3/mock control cells; red circles, PC-3/hTERT cells). Data is expressed as the mean  $\pm$  SD of  $n = 6$ .
