# Supplementary material
Source: PubMed Central journal article supplement (PMC3719673)
Supplement: MCB.00136-13_zmb999100051so3.pdf [file MCB.00136-13_zmb999100051so3.pdf]

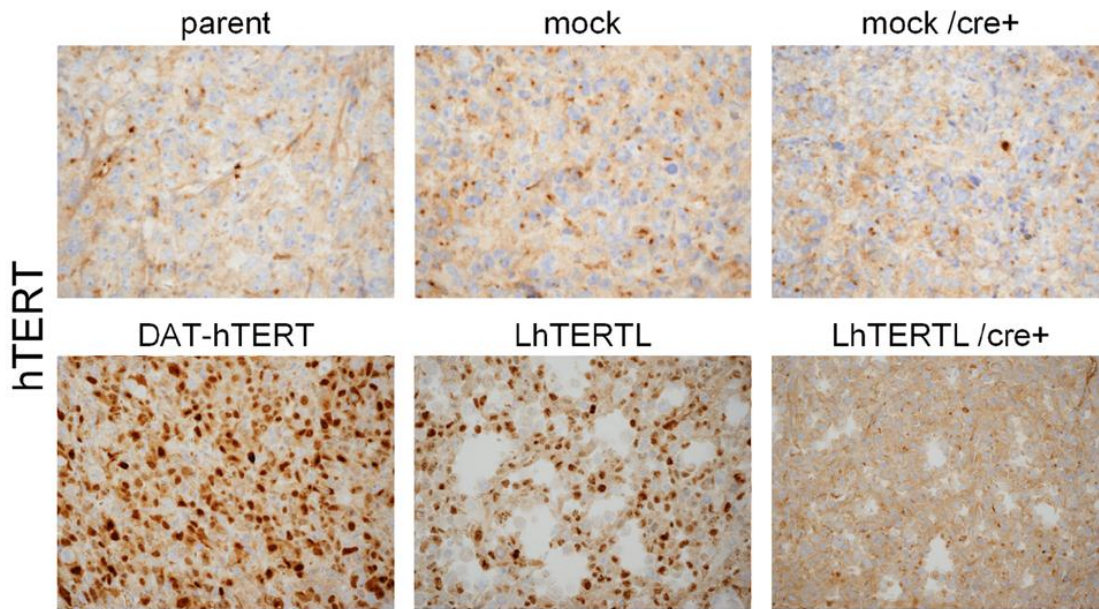

**FIG S3** Immunohistochemical staining of hTERT. We confirmed overexpression of hTERT in PC-3/DAT-hTERT and PC-3/LhTERTL nuclei but not in PC-3/LhTERTL/cre+ cells, as well as in the parental or mock PC-3 cells.
