# Supplementary material
Source: PubMed Central journal article supplement (PMC3719673)
Supplement: MCB.00136-13_zmb999100051so4.pdf [file MCB.00136-13_zmb999100051so4.pdf]

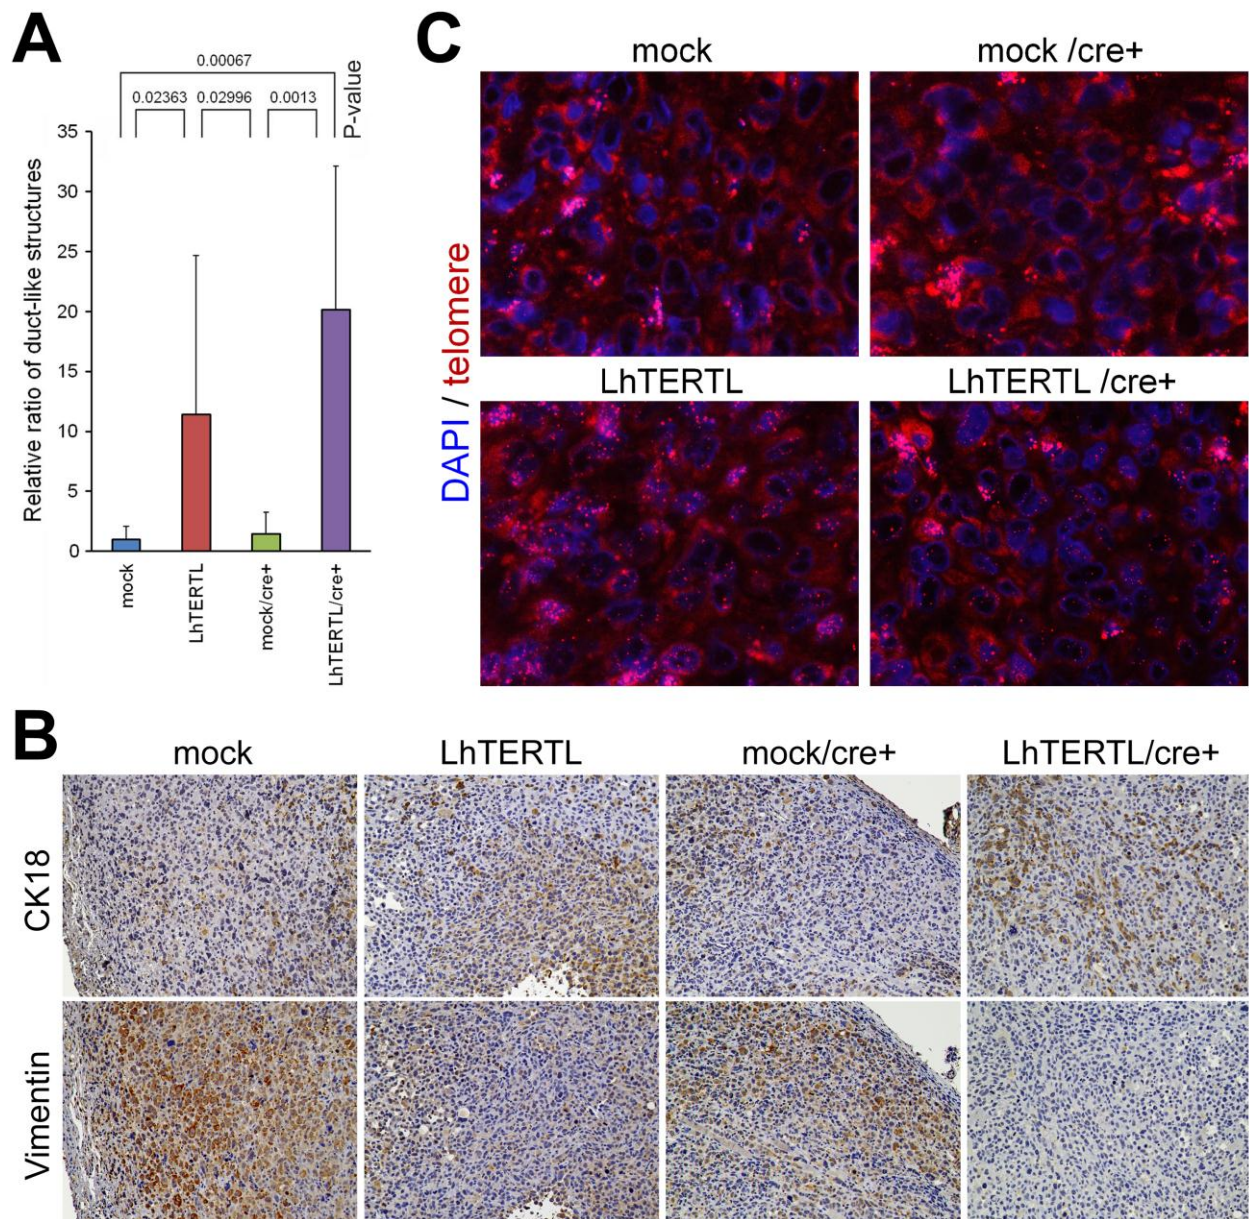

**FIG S4** More detailed analyses of differentiation and telomere length in four PC-3 xenograft tumors. **(A)** Formation of duct-like structures by telomere elongation in PC-3 cells. Parameters are the relative average and standard deviation of the number of ducts per unit area in each tumor ( $n = 10-11$ ). Significant differences were found

between each combination of control and telomere-elongated xenograft tumors (two-tailed *t*-test). **(B)** Immunohistochemical staining of cytokeratin 18 (epithelial marker) and vimentin (mesenchymal marker). Original magnification, 200 $\times$ . **(C)** Telomere FISH images of PC-3 xenograft tumors. Red (Cy3) color indicates telomere signals with blue DAPI-stained nuclei. Relative to the control PC-3 xenografts, overtly long telomeres were maintained in PC-3/LhTERTL and PC-3/LhTERTL/cre+ xenograft tumors. Extremely strong telomere signals were detected in mouse cells because in contrast to humans they have very long telomeres (2). Original magnification, 400 $\times$ .
