# Supplementary material
Source: PubMed Central journal article supplement (PMC3719673)
Supplement: MCB.00136-13_zmb999100051so5.pdf [file MCB.00136-13_zmb999100051so5.pdf]

increasing P value. Each category has more than 10 probes that were affected by telomere elongation (a total of 54,675 probe sets,  $P < 0.01$  Fisher's exact test). In a xenograft setting, all enriched categories were related to the innate immune system. **(B)** Representative probe sets in response to virus (upper) and immune response (lower) categories. Most probes were downregulated in telomere-elongated tumors. The graphs were divided into two parts by high or low signal values. IFNGR1 expressions exhibited no differences in each sample (see Discussion section). **(C)** Disease summary of "Immune response" or "Response to virus" categories analyzed using the OncoPrint database. Expression of most genes listed are upregulated in cancer as compared to the normal tissues. In accordance with upregulation in telomere-elongated xenografts, only the C5 (complement component 5) gene is under-expressed in cancer. Expression of IFNGR1 is similar in cancer and normal tissues, unlike differentiated normal cells (see Discussion section).
