# Supplementary material
Source: PubMed Central journal article supplement (PMC3719673)
Supplement: MCB.00136-13_zmb999100051so6.pdf [file MCB.00136-13_zmb999100051so6.pdf]

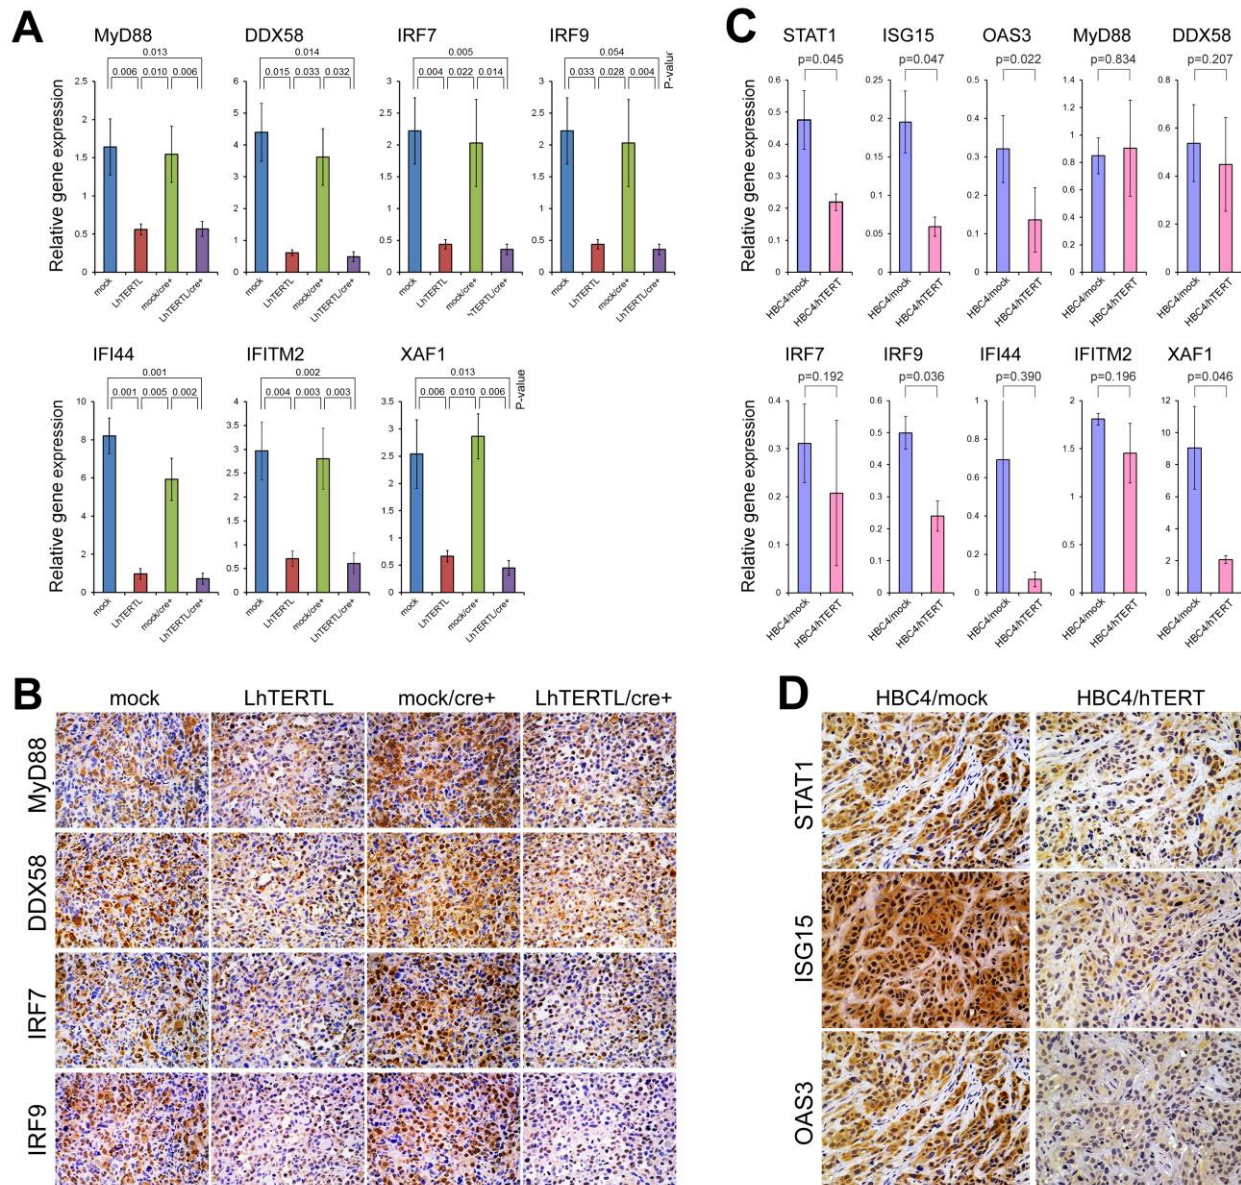

**FIG S6** Telomere elongation suppressed immune response-related gene expressions in PC-3 xenograft tumors. **(A)** The RNA expressions of seven genes were quantified using real-time PCR. The values of each expression were normalized to that of  $\beta$ -actin. Error bars indicate the standard deviations ( $n = 3$ ). There were significant differences in each combination of control (mock or mock/cre+) and telomere-elongated (LhTERTL or LhTERTL/cre+) xenograft tumors (two-tailed  $t$ -test). **(B)**

Immunohistochemical staining of four immune response-related genes in PC-3 xenograft tumors. Original magnification, 200x. **(C)** The RNA expressions of ten immune response-related genes in HBC4 xenograft tumors were quantified using real-time PCR. The values of each expression were normalized to that of  $\beta$ -actin. Error bars indicate the standard deviations ( $n = 3$ ). **(D)** Immunohistochemical staining of STAT1, ISG15 and OAS3 genes in HBC4 xenograft tumors. Original magnification, 400x.
