# Supplementary material
Source: PubMed Central journal article supplement (PMC3719673)
Supplement: MCB.00136-13_zmb999100051so7.pdf [file MCB.00136-13_zmb999100051so7.pdf]

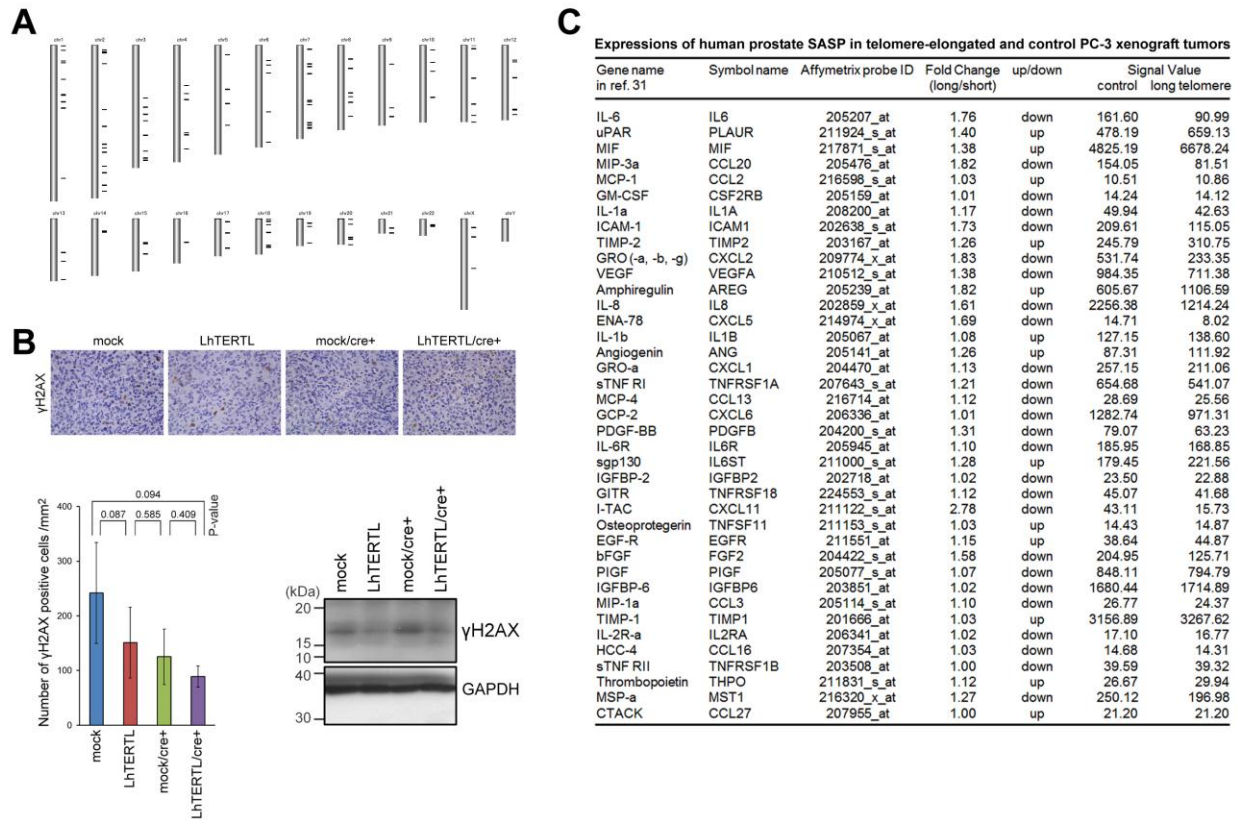

**FIG S7** The telomere length-dependent regulation of innate immune system related-genes is not mediated by telomere position effect, DNA damage signaling or senescence-associated secretory phenotype (SASP). **(A)** Region map of the 190 probes (151 genes) affected by telomere elongation in tumors. The horizontal black bars depict each gene locus in the chromosomes; no deflections were observed in the vicinity of telomeres. **(B)** Detection of  $\gamma$ H2AX in four PC-3 xenograft tumors. No substantial differences were found in terms of Immunohistochemical staining, the rate of  $\gamma$ H2AX positive cells per unit area or accumulation of  $\gamma$ H2AX between control xenograft tumors and xenograft tumors with elongated telomeres. Original magnification, 200 $\times$ .

(C) A list of microarray expression data of human prostate SASP. Among them, no gene expressions, except for CXCL11, were changed with fold changes of  $> 2.0$  by telomere elongation.
